# Supplementary material for: Screening of tau protein kinase inhibitors in a tauopathy-relevant cell-based model of tau hyperphosphorylation and oligomerization
Source: PubMed Central journal article supplement (PMC7373298; doi:10.1371/journal.pone.0224952), 2020-07-21
Supplement: pone.0224952.s002.pdf [file pone.0224952.s002.pdf]

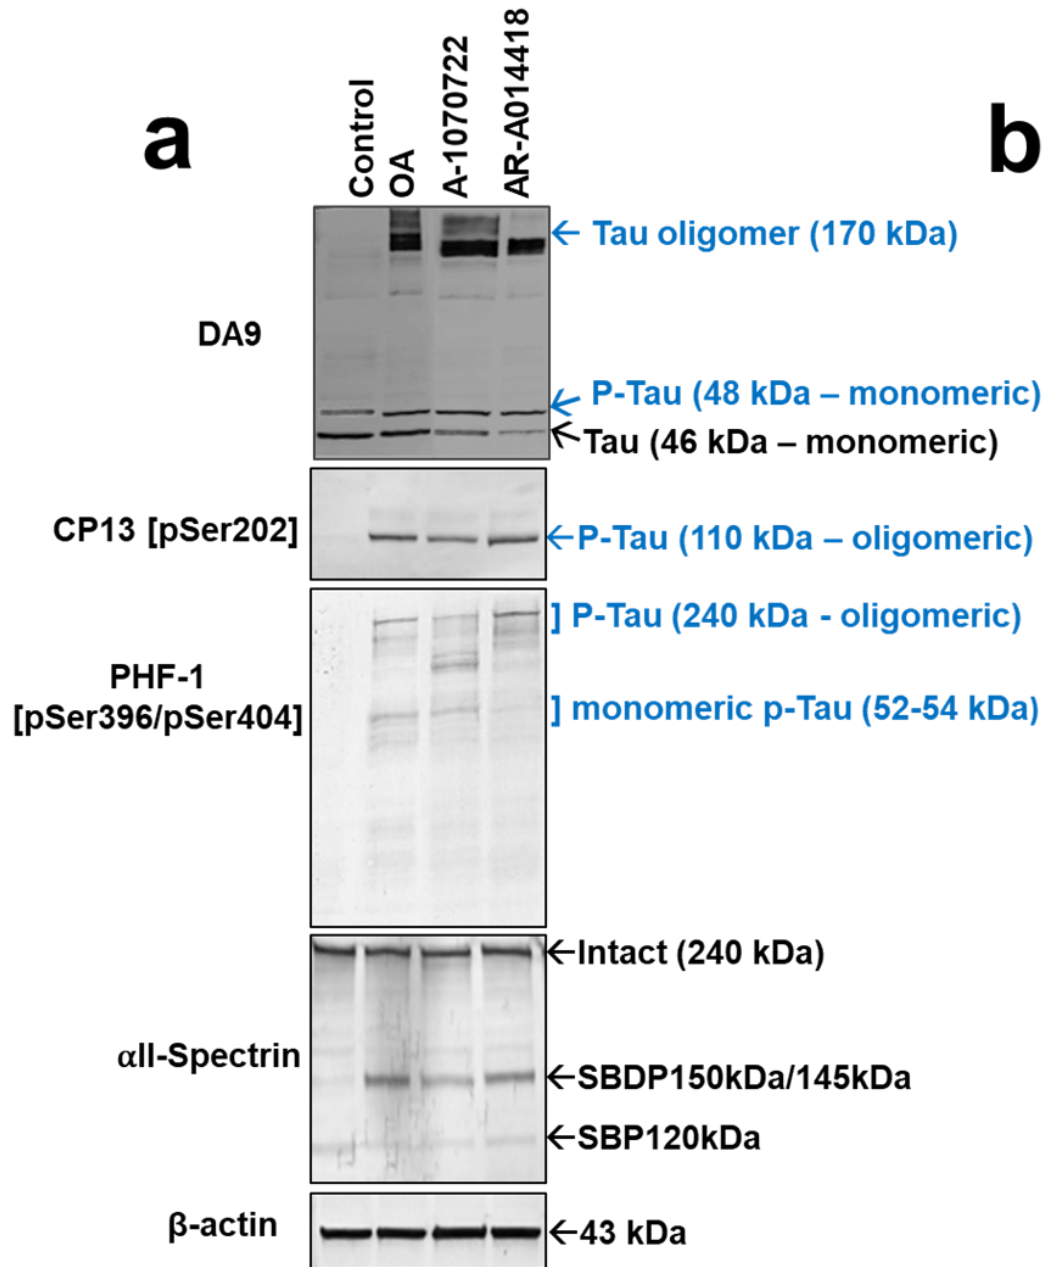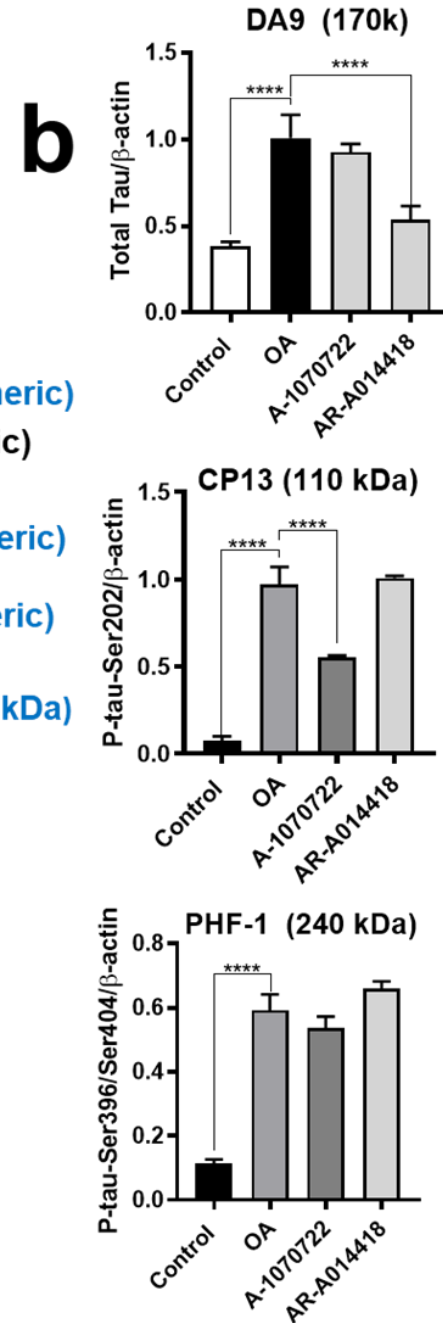

**S2 Fig. Effect of additional two GSK-3 protein kinase inhibitors on OA-induced tau hyperphosphorylation and oligomerization in N2a cells (with cell-death linked protease inhibitors (calpain/caspase inhibitors)).** A continuation of Fig2 experiment is presented to include two other potent GSK-3 kinase inhibitors, AR and A-107. The specific experimental treatments are as described in materials and methods. (a). Immunoblots of N2a cells extracted protein using p-tau antibodies (CP13 and PHF-1), total tau (DA9), and  $\alpha$ -Spectrin.  $\alpha$ -Spectrin was probed to assess cell apoptosis monitored SBDP150/145 kDa and SBDP120 kDa. Kinase inhibition of phosphorylation and oligomerization was monitored by evaluating the levels of p-tau antibodies and total tau (blue arrows) and non-phospho tau (black arrows). For all conditions, S+Z were added for 1h before the treatments. (b). Immunoblot quantifications and statistical analysis. All data are normalized to  $\beta$ -actin and are expressed as a percentage of control. Data are presented as  $\pm$  SEM for n=3. Statistical analysis was performed with one-way ANOVA. For multiple comparisons, one-way ANOVA followed by the Bonferroni's post-hoc test was performed. \*p<0.05, \*\*p<0.01, \*\*\*p<0.001, \*\*\*\*p<0.0001 and ns: non-significant.
